# Supplementary material for: Structural retinal changes in cerebral small vessel disease
Source: PubMed Central journal article supplement (PMC9166694; doi:10.1038/s41598-022-13312-z), 2022-06-03
Supplement: 41598_2022_13312_MOESM1_ESM.pdf [file 41598_2022_13312_MOESM1_ESM.pdf]

## **Supplementary Material - Structural Retinal Changes in Cerebral Small Vessel Disease**

S. Magdalena Langner<sup>1+</sup>, Jan H. Terheyden MD<sup>1+</sup>, Clara F. Geerling<sup>1</sup>, Christine Kindler MD<sup>2,3</sup>, Vera C. W. Keil MD<sup>4</sup>, Christopher A. Turski MD<sup>1,3</sup>, Gabrielle N. Turski MD<sup>1,3</sup>, Charlotte Behning<sup>5</sup>, Maximilian W. M. Wintergerst MD<sup>1</sup>, Gabor C. Petzold MD<sup>2,3,6#</sup>, Robert P. Finger MD, PhD<sup>1#\*</sup>

<sup>1</sup> Department of Ophthalmology, University Hospital Bonn, Bonn, Germany

<sup>2</sup> Department of Neurology, University Hospital Bonn, Bonn, Germany

<sup>3</sup> German Center for Neurodegenerative Diseases (DZNE), Bonn, Germany

<sup>4</sup> Department of Radiology, Amsterdam UMC, location VUmc, De Boelelaan 1117, 1081 HV Amsterdam, The Netherlands

<sup>5</sup> Institute for Medical Biometry, Informatics and Epidemiology, University Hospital Bonn, Bonn, Germany

<sup>6</sup> Division of Vascular Neurology, University Hospital Bonn, Bonn, Germany

+These authors contributed equally.

#These authors jointly supervised the work.

### **Corresponding author:**

Univ.-Prof. Dr. med. Robert Finger, PhD

Dpt. Ophthalmology, University of Bonn

Ernst-Abbe-Str. 2, 53127 Bonn, Germany

Email: robert.finger@ukbonn.de

Telephone: +49 228 287 155 05

**Supplementary Table 1**

*Results of linear regression of MoCA, structural retinal parameters and white matter lesions volume ratio index in patients with cerebral small vessel disease with and without adjusting for age*

|                     | WMRI association          |          | WMRI association, age adjusted |          |
|---------------------|---------------------------|----------|--------------------------------|----------|
|                     | $\beta$ [95% CI]          | <i>p</i> | $\beta$ [95% CI]               | <i>p</i> |
| MoCA                | -0.037 [-0.093, 0.020]    | 0.192    | 0.002 [-0.046, 0.050]          | 0.940    |
| <b>Total Retina</b> |                           |          |                                |          |
| total volume        | -1.178 [-3.609, 1.254]    | 0.328    | -0.465 [-2.365, 1.435]         | 0.618    |
| Foveal              | 1.049 [-9.481, 11.579]    | 0.839    | -1.099 [-9.135, 6.936]         | 0.780    |
| pf. nasal           | -6.334 [-17.468, 4.799]   | 0.252    | -2.966 [-11.696, 5.765]        | 0.490    |
| pf. inferior        | -5.468 [-14.702, 3.766]   | 0.234    | -1.959 [-9.320, 5.401]         | 0.588    |
| pf. temporal        | -4.615 [-16.010, 6.780]   | 0.412    | -0.131 [-9.145, 8.884]         | 0.976    |
| pf. superior        | -9.035 [-21.006, 2.936]   | 0.133    | -3.453 [-13.263, 6.357]        | 0.475    |
| <b>GCL</b>          |                           |          |                                |          |
| total volume        | -2.300 [-9.065, 4.465]    | 0.490    | -2.317 [-7.401, 2.767]         | 0.356    |
| foveal              | -3.850 [-85.319, 77.619]  | 0.923    | -27.013 [-88.617, 34.590]      | 0.374    |
| pf. nasal           | -2.336 [-30.499, 25.828]  | 0.866    | -5.486 [-26.766, 15.793]       | 0.600    |
| pf. inferior        | -10.201 [-30.225, 9.823]  | 0.304    | -8.973 [-24.021, 6.075]        | 0.230    |
| pf. temporal        | -8.748 [-36.888, 19.391]  | 0.528    | -7.642 [-28.904, 13.620]       | 0.465    |
| pf. superior        | -12.709 [-47.05, 21.640]  | 0.453    | -9.592 [-35.651, 16.468]       | 0.455    |
| <b>IPL</b>          |                           |          |                                |          |
| total volume        | -7.740 [-18.521, 3.042]   | 0.152    | -4.809 [-13.210, 3.592]        | 0.249    |
| foveal              | 19.902 [-30.689, 70.494]  | 0.425    | 13.605 [-24.923, 52.133]       | 0.473    |
| pf. temporal        | -12.151 [-60.064, 35.762] | 0.606    | -6.375 [-42.882, 30.133]       | 0.722    |
| pf. superior        | -16.579 [-62.269, 29.111] | 0.462    | -12.150 [-46.845, 22.545]      | 0.477    |
| <b>INL</b>          |                           |          |                                |          |
| total volume        | -3.418 [-16.879, 10.042]  | 0.606    | -1.520 [-11.795, 8.755]        | 0.763    |
| foveal              | 15.882 [-34.951, 66.714]  | 0.526    | 12.612 [-25.892, 51.116]       | 0.505    |
| pf. nasal           | -1.645 [-53.175, 49.886]  | 0.948    | 1.003 [-38.068, 40.074]        | 0.958    |
| pf. inferior        | -17.049 [-57.472, 23.374] | 0.393    | 2.855 [-29.651, 35.360]        | 0.858    |
| pf. temporal        | 4.247 [-47.259, 55.752]   | 0.867    | -11.843 [-51.280, 27.595]      | 0.541    |
| pf. superior        | -41.327 [-89.970, 7.315]  | 0.092    | -28.994 [-66.592, 8.603]       | 0.125    |
| <b>OPL</b>          |                           |          |                                |          |
| total volume        | 5.550 [-2.830, 13.930]    | 0.185    | 0.286 [-6.812, 7.384]          | 0.934    |
| pf. nasal           | 5.850 [-14.877, 26.576]   | 0.566    | -5.563 [-22.081, 10.954]       | 0.494    |
| pf. inferior        | -0.695 [-21.559, 20.169]  | 0.946    | -4.731 [-20.527, 11.065]       | 0.542    |
| pf. temporal        | 28.158 [-16.559, 72.876]  | 0.207    | 14.020 [-21.180, 49.220]       | 0.419    |
| pf. superior        | 21.455 [-2.487, 45.396]   | 0.077    | 6.562 [-14.170, 27.294]        | 0.520    |
| <b>ONL</b>          |                           |          |                                |          |
| total volume        | -3.075 [-8.247, 2.096]    | 0.232    | 1.218 [-3.309, 5.745]          | 0.584    |
| foveal              | -15.908 [-51.350, 19.534] | 0.364    | -6.488 [-34.037, 21.062]       | 0.631    |
| pf. nasal           | -8.656 [-23.050, 5.738]   | 0.227    | 2.763 [-9.761, 15.287]         | 0.653    |
| pf. inferior        | 0.965 [-17.015, 18.946]   | 0.913    | 6.245 [-7.342, 19.832]         | 0.352    |
| pf. temporal        | -11.451 [-36.783, 13.881] | 0.361    | 5.626 [-15.413, 26.665]        | 0.586    |

|                   |                          |       |                          |       |
|-------------------|--------------------------|-------|--------------------------|-------|
| pf. superior      | -16.610 [-35.134, 1.913] | 0.077 | 1.451 [-16.421, 19.322]  | 0.868 |
| <b>RPE*</b>       |                          |       |                          |       |
| total volume      | 9.465 [-6.978, 25.908]   | 0.247 | 8.363 [-3.960, 20.686]   | 0.174 |
| pf. nasal         | 27.025 [-23.890, 77.940] | 0.285 | 25.919 [-12.040, 63.878] | 0.172 |
| pf. inferior      | 17.319 [-38.307, 72.944] | 0.527 | 17.962 [-23.858, 59.783] | 0.384 |
| pf. temporal      | 29.187 [-35.632, 94.006] | 0.363 | 20.876 [-28.459, 70.210] | 0.391 |
| pf. superior      | 29.142 [-20.976, 79.260] | 0.242 | 24.535 [-13.189, 62.259] | 0.192 |
| <b>pRNFL</b>      |                          |       |                          |       |
| total             | -0.027 [-0.058, 0.004]   | 0.082 | -0.020 [-0.044, 0.004]   | 0.095 |
| nasal             | -0.018 [-0.055, 0.018]   | 0.312 | -0.008 [-0.037, 0.020]   | 0.554 |
| N/T               | 0.892 [-0.494, 2.277]    | 0.197 | 0.893 [-0.136, 1.921]    | 0.086 |
| nasal inferior    | -0.011 [-0.029, 0.006]   | 0.198 | -0.003 [-0.018, 0.011]   | 0.646 |
| temporal inferior | 0.001 [-0.015, 0.018]    | 0.862 | -0.002 [-0.015, 0.011]   | 0.726 |
| temporal superior | -0.013 [-0.030, 0.003]   | 0.102 | -0.010 [-0.023, 0.002]   | 0.101 |
| nasal superior    | -0.019 [-0.037, 0.000]   | 0.052 | -0.013 [-0.028, 0.002]   | 0.094 |
| <b>MRW</b>        |                          |       |                          |       |
| total             | -0.004 [-0.008, 0.000]   | 0.075 | -0.002 [-0.006, 0.001]   | 0.233 |
| N/T               | 0.205 [-0.636, 1.047]    | 0.619 | 0.006 [-0.649, 0.660]    | 0.986 |
| temporal          | -0.004 [-0.007, 0.000]   | 0.054 | -0.002 [-0.005, 0.001]   | 0.239 |
| temporal superior | -0.003 [-0.007, 0.001]   | 0.155 | -0.001 [-0.004, 0.002]   | 0.389 |

Associations between retinal parameters and WMRI were assessed using linear regression. Model 1: univariate regression, Model 2: multivariable regression adjusted for age.

Note: The volumes of the macular layers correspond to the foveal and parafoveal volumes (3-mm-circle).

\* The linear regression analysis of the foveal RPE volume is not listed, because the value contained a constant.

Abbreviations: MoCA, Montreal Cognitive Assessment; WMRI, white matter lesions volume ratio index;  $\beta$ , standardized coefficient; CI, confidence interval; pf., parafoveal; GCL, ganglion cell layer; IPL, inner plexiform layer; INL, inner nuclear layer; OPL, outer plexiform layer; ONL, outer nuclear layer; RPE, retinal pigment epithelium; pRNFL, peripapillary retinal nerve fiber layer; N/T, ratio nasal to temporal; MRW, Bruch's membrane opening-minimum rim width.

## Supplementary Table 2

Results of linear regression of MoCA, structural retinal parameters and number of white matter lesions in patients with cerebral small vessel disease

|                     | NOL association              |          | NOL association, age adjusted |          |
|---------------------|------------------------------|----------|-------------------------------|----------|
|                     | $\beta$ [95%-CI]             | <i>p</i> | $\beta$ [95%-CI]              | <i>p</i> |
| MoCA                | -0.568 [-1.322, 0.186]       | 0.133    | -0.154 [-0.875, 0.567]        | 0.663    |
| <b>Total Retina</b> |                              |          |                               |          |
| total volume        | -26.772 [-58.601, 5.057]     | 0.096    | -18.997 [-46.636, 8.643]      | 0.169    |
| Foveal              | -41.798 [-183.956, 100.359]  | 0.550    | -67.421 [-185.310, 50.468]    | 0.249    |
| pf. nasal           | -128.036 [-274.181, 18.108]  | 0.083    | -91.154 [-218.363, 36.054]    | 0.152    |
| pf. inferior        | -99.660 [-222.101, 22.781]   | 0.106    | -61.301 [-169.864, 47.262]    | 0.255    |
| pf. temporal        | -117.923 [-267.184, 31.338]  | 0.116    | -70.104 [-202.668, 62.459]    | 0.286    |
| <b>GCL</b>          |                              |          |                               |          |
| pf. inferior        | -208.231 [-472.662, 56.200]  | 0.117    | -194.188 [-413.160, 24.785]   | 0.080    |
| pf. temporal        | -268.182 [-637.470, 101.106] | 0.147    | -255.520 [-561.100, 50.060]   | 0.097    |
| pf. superior        | -343.939 [-794.266, 106.387] | 0.128    | -308.599 [-684.025, 66.826]   | 0.103    |
| <b>IPL</b>          |                              |          |                               |          |

|                |                              |       |                              |       |
|----------------|------------------------------|-------|------------------------------|-------|
| total volume   | -135.669 [-277.840, 6.502]   | 0.061 | -103.199 [-225.920, 19.521]  | 0.095 |
| foveal         | -99.451 [-794.603, 595.702]  | 0.771 | -174.010 [-756.264, 408.243] | 0.543 |
| pf. temporal   | -140.777 [-792.741, 511.188] | 0.660 | -74.153 [-624.777, 476.472]  | 0.783 |
| pf. superior   | -336.607 [-948.791, 275.577] | 0.268 | -286.036 [-800.480, 228.408] | 0.262 |
| <b>INL</b>     |                              |       |                              |       |
| total volume   | -49.425 [-232.181, 133.330]  | 0.582 | -27.606 [-182.268, 127.055]  | 0.716 |
| foveal         | 25.275 [-671.006, 721.555]   | 0.941 | -12.679 [-598.248, 572.889]  | 0.965 |
| pf. nasal      | -46.667 [-746.619, 653.286]  | 0.892 | -16.154 [-604.788, 572.479]  | 0.955 |
| pf. inferior   | -204.225 [-755.296, 346.845] | 0.452 | 24.631 [-465.316, 514.578]   | 0.918 |
| pf. temporal   | 108.333 [-590.460, 807.126]  | 0.752 | -75.102 [-673.163, 522.959]  | 0.798 |
| pf. superior   | -481.667 [-1153.18, 189.853] | 0.152 | -339.539 [-917.692, 238.614] | 0.237 |
| <b>OPL</b>     |                              |       |                              |       |
| total volume   | 78.078 [-35.477, 191.633]    | 0.169 | 19.658 [-86.976, 126.293]    | 0.707 |
| pf. nasal      | 151.913 [-124.605, 428.430]  | 0.269 | 29.830 [-221.204, 280.863]   | 0.808 |
| pf. inferior   | -95.355 [-376.130, 185.420]  | 0.491 | -143.117 [-375.285, 89.050]  | 0.215 |
| pf. temporal   | 205.804 [-416.134, 827.742]  | 0.502 | 38.041 [-499.455, 575.538]   | 0.885 |
| <b>ONL</b>     |                              |       |                              |       |
| total volume   | -59.169 [-127.286, 8.949]    | 0.086 | -16.159 [-84.460, 52.141]    | 0.630 |
| foveal         | -214.674 [-696.341, 266.993] | 0.367 | -106.870 [-521.530, 307.789] | 0.600 |
| pf. nasal      | -179.439 [-366.875, 7.998]   | 0.060 | -67.853 [-255.187, 119.481]  | 0.462 |
| pf. inferior   | 20.636 [-223.577, 264.849]   | 0.863 | 81.827 [-123.803, 287.457]   | 0.420 |
| pf. temporal   | -222.917 [-560.770, 114.936] | 0.186 | -41.896 [-360.383, 276.591]  | 0.788 |
| <b>RPE</b>     |                              |       |                              |       |
| total volume   | 104.301 [-121.254, 329.856]  | 0.350 | 91.574 [-97.630, 280.777]    | 0.328 |
| pf. nasal      | 298.864 [-398.482, 996.210]  | 0.386 | 286.103 [-296.642, 868.849]  | 0.321 |
| pf. inferior   | 324.342 [-425.840, 1074.524] | 0.382 | 331.774 [-293.084, 956.633]  | 0.284 |
| pf. temporal   | 467.273 [-407.523, 1342.068] | 0.282 | 372.219 [-366.307, 1110.745] | 0.309 |
| pf. superior   | 118.333 [-580.184, 816.851]  | 0.730 | 64.522 [-524.147, 653.192]   | 0.823 |
| <b>pRNFL*</b>  |                              |       |                              |       |
| total          | -0.386 [-0.805, 0.034]       | 0.070 | -0.302 [-0.657, 0.052]       | 0.091 |
| nasal          | -0.132 [-0.644, 0.379]       | 0.598 | -0.010 [-0.443, 0.424]       | 0.964 |
| nasal inferior | -0.102 [-0.348, 0.145]       | 0.403 | -0.002 [-0.219, 0.216]       | 0.989 |
| temp. inferior | -0.066 [-0.297, 0.166]       | 0.562 | -0.112 [-0.301, 0.078]       | 0.234 |
| nasal superior | -0.258 [-0.516, 0.000]       | 0.050 | -0.187 [-0.410, 0.036]       | 0.097 |
| <b>MRW</b>     |                              |       |                              |       |
| N/T            | 2.890 [-8.706, 14.486]       | 0.612 | 0.480 [-9.318, 10.277]       | 0.920 |

Associations between retinal parameters and NOL were assessed using linear regression. Model 1: univariate regression, Model 2: multivariable regression adjusted for age.

Note: The volumes of the macular layers correspond to the foveal and parafoveal volumes (3-mm-circle).

\* The linear regression analysis of the foveal RPE volume is not listed, because the value contained a constant.

Abbreviations: MoCA, Montreal Cognitive Assessment; NOL, number of white matter lesions;  $\beta$ , standardized coefficient; CI, confidence interval; GCL, ganglion cell layer; IPL, inner plexiform layer; INL, inner nuclear layer; OPL, outer plexiform layer; ONL, outer nuclear layer; RPE, retinal pigment epithelium; pRNFL, peripapillary retinal nerve fiber layer; MRW, Bruch's membrane opening-minimum rim width; N/T, ratio nasal to temporal.

**Supplementary Table 3***Results of structural retinal parameters in subjects with cerebral small vessel disease*

---

|                                         |             |
|-----------------------------------------|-------------|
| Total retinal volume (mm <sup>3</sup> ) |             |
| total                                   | 2.31 ± 0.11 |
| foveal                                  | 0.22 ± 0.02 |
| pf. nasal                               | 0.53 ± 0.02 |
| pf. inferior                            | 0.52 ± 0.03 |
| pf. temporal                            | 0.51 ± 0.02 |
| pf. superior                            | 0.53 ± 0.02 |
| GCL volume (mm <sup>3</sup> )           |             |
| total                                   | 0.31 ± 0.04 |
| foveal                                  | 0.01 ± 0.00 |
| pf. nasal                               | 0.08 ± 0.01 |
| pf. inferior                            | 0.08 ± 0.01 |
| pf. temporal                            | 0.07 ± 0.01 |
| pf. superior                            | 0.08 ± 0.01 |
| IPL volume (mm <sup>3</sup> )           |             |
| total                                   | 0.27 ± 0.02 |
| foveal                                  | 0.01 ± 0.01 |
| pf. nasal                               | 0.06 ± 0.01 |
| pf. inferior                            | 0.06 ± 0.01 |
| pf. temporal                            | 0.06 ± 0.01 |
| pf. superior                            | 0.06 ± 0.01 |
| INL volume (mm <sup>3</sup> )           |             |
| total                                   | 0.27 ± 0.02 |
| foveal                                  | 0.02 ± 0.01 |
| pf. nasal                               | 0.06 ± 0.01 |
| pf. inferior                            | 0.07 ± 0.01 |
| pf. temporal                            | 0.06 ± 0.01 |
| pf. superior                            | 0.06 ± 0.01 |
| OPL volume (mm <sup>3</sup> )           |             |
| total                                   | 0.21 ± 0.03 |
| foveal                                  | 0.02 ± 0.00 |
| pf. nasal                               | 0.05 ± 0.01 |
| pf. inferior                            | 0.05 ± 0.01 |
| pf. temporal                            | 0.04 ± 0.01 |
| pf. superior                            | 0.05 ± 0.01 |
| ONL volume (mm <sup>3</sup> )           |             |
| total                                   | 0.52 ± 0.05 |
| foveal                                  | 0.08 ± 0.01 |
| pf. nasal                               | 0.12 ± 0.02 |
| pf. inferior                            | 0.10 ± 0.01 |
| pf. temporal                            | 0.12 ± 0.01 |
| pf. superior                            | 0.11 ± 0.01 |
| RPE volume (mm <sup>3</sup> )           |             |
| total                                   | 0.10 ± 0.02 |
| foveal                                  | 0.01 ± 0.00 |
| pf. nasal                               | 0.02 ± 0.01 |

|                      |                |
|----------------------|----------------|
| pf. inferior         | 0.02 ± 0.00    |
| pf. temporal         | 0.02 ± 0.00    |
| pf. superior         | 0.02 ± 0.01    |
| pRNFL thickness (µm) |                |
| total                | 73.62 ± 8.21   |
| nasal                | 58.69 ± 7.18   |
| N/T                  | 1.06 ± 0.19    |
| nasal inferior       | 71.88 ± 14.75  |
| temporal inferior    | 119.23 ± 15.84 |
| temporal             | 56.69 ± 8.62   |
| PMB                  | 41.15 ± 6.71   |
| temporal superior    | 110.58 ± 15.55 |
| nasal superior       | 72.08 ± 13.19  |
| BMO-MRW (µm)         |                |
| total                | 323.04 ± 59,37 |
| nasal                | 361.92 ± 72.29 |
| N/T                  | 1.61 ± 0.32    |
| nasal inferior       | 393.27 ± 74.21 |
| temporal inferior    | 334.81 ± 67.48 |
| Temporal             | 233.35 ± 65.52 |
| PMB                  | 216.69 ± 71.20 |
| temporal superior    | 289.12 ± 66.75 |
| nasal superior       | 339.08 ± 70.80 |

---

Values are mean ± SD. The volumes of the macular layers correspond to the foveal and parafoveal volumes (3-mm-circle)

Abbreviations: pf., parafoveal; GCL, ganglion cell layer; IPL, inner plexiform layer; INL, inner nuclear layer; OPL, outer plexiform layer; ONL, outer nuclear layer; RPE, retinal pigment epithelium; pRNFL, peripapillary retinal nerve fiber layer; N/T, ratio nasal to temporal; PMB, papillo-macular bundle; BMO-MRW, Bruch's membrane opening-minimum rim width.
